# Supplementary material
Source: MDPI journal article supplement (https://www.mdpi.com/2311-7524/9/6/713)

**Figure S1.** Relationship between growth rate on PDA to root lesion size

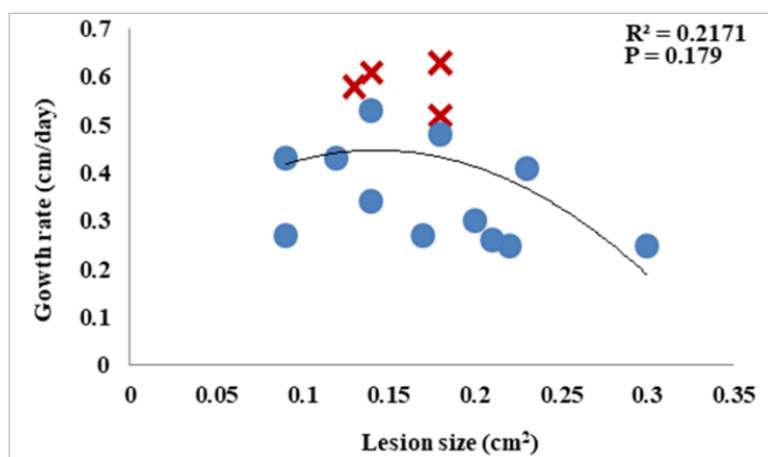

**Figure S2.** Relatedness of the aa sequences of predicted secreted

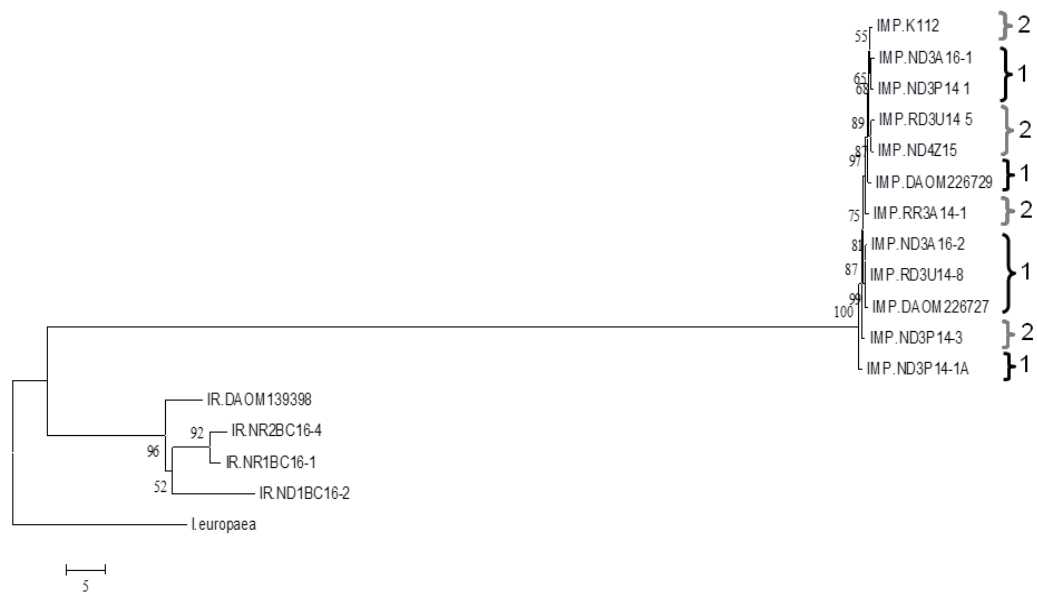

**Figure S3.** Relatedness of the aa sequences of secreted

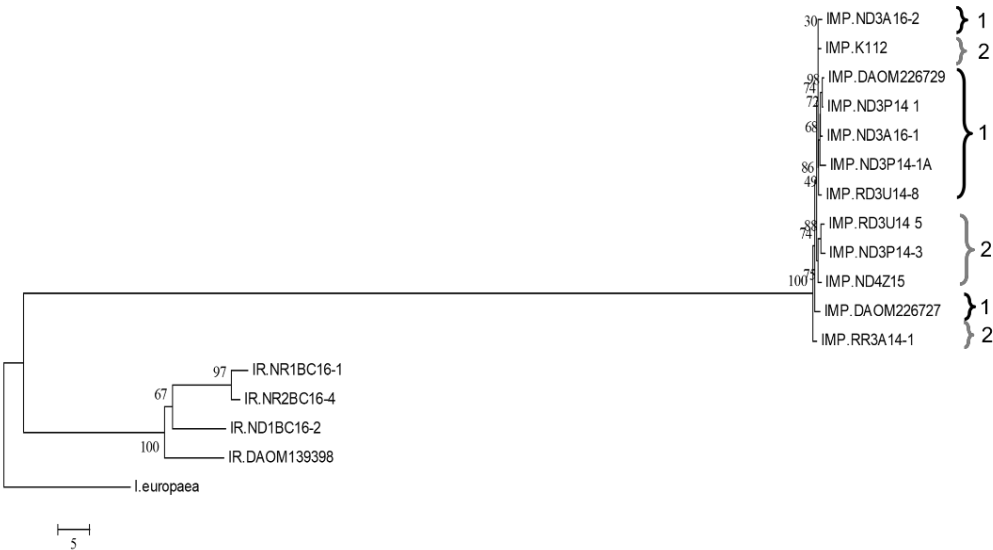

**Figure S4.** Relatedness of the aa sequences of the cone-rod homeobox effector,

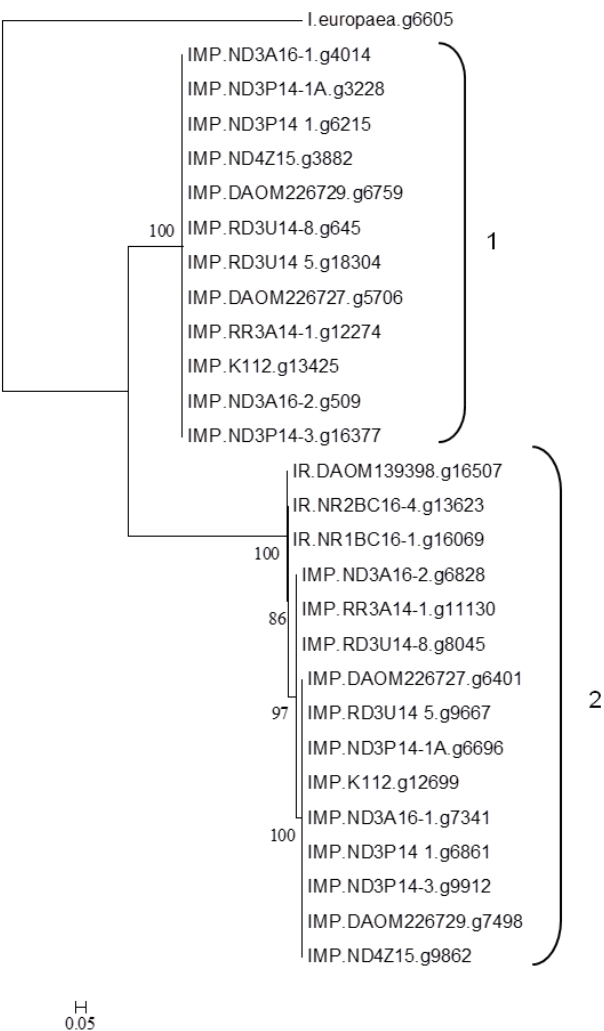

**Figure S5.** Relatedness of the aa sequences of the secreted in xylem 6

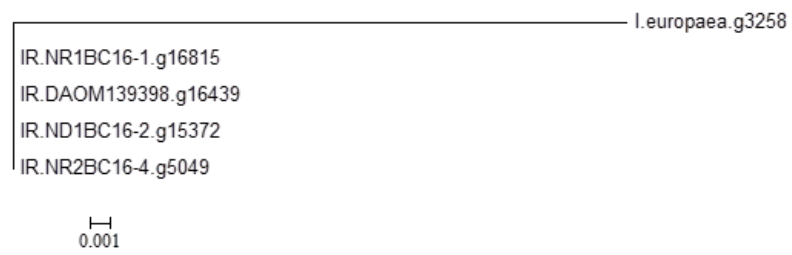

**Figure S6.** Relatedness of the aa sequences of the triacetylfulsarinine C siderophore biosynthesis enzyme, L-ornithine N<sup>5</sup>-oxygenase

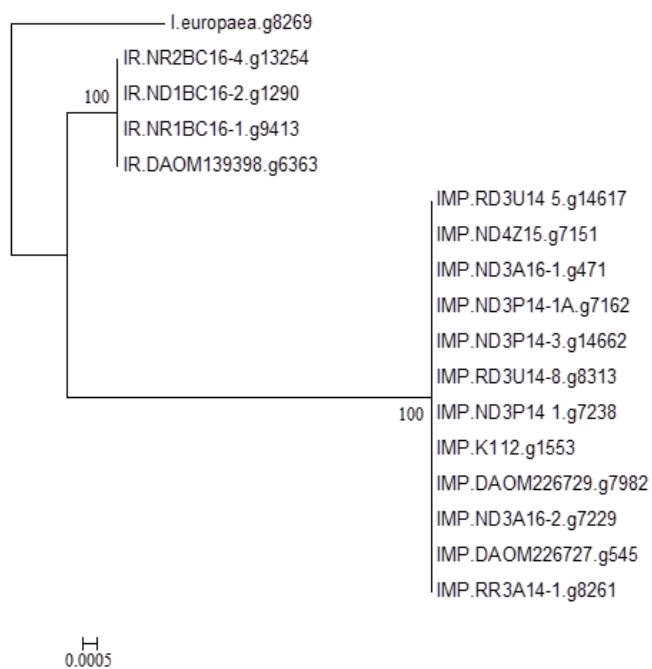

**Figure S7.** Relatedness of the aa sequences of the HC-toxin branched-chain amino acid aminotransferase, TOXF, protein

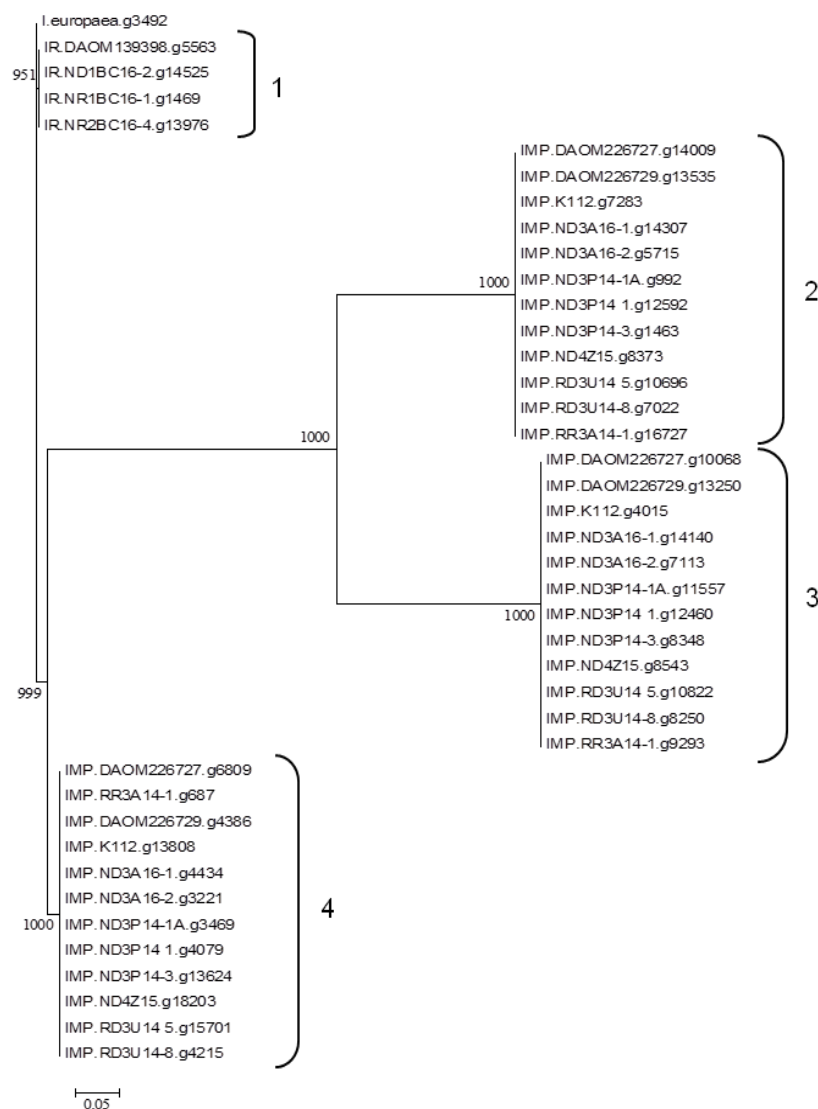

**Figure S8.** Relatedness of the aa sequences of the avenacinase, Sap1,

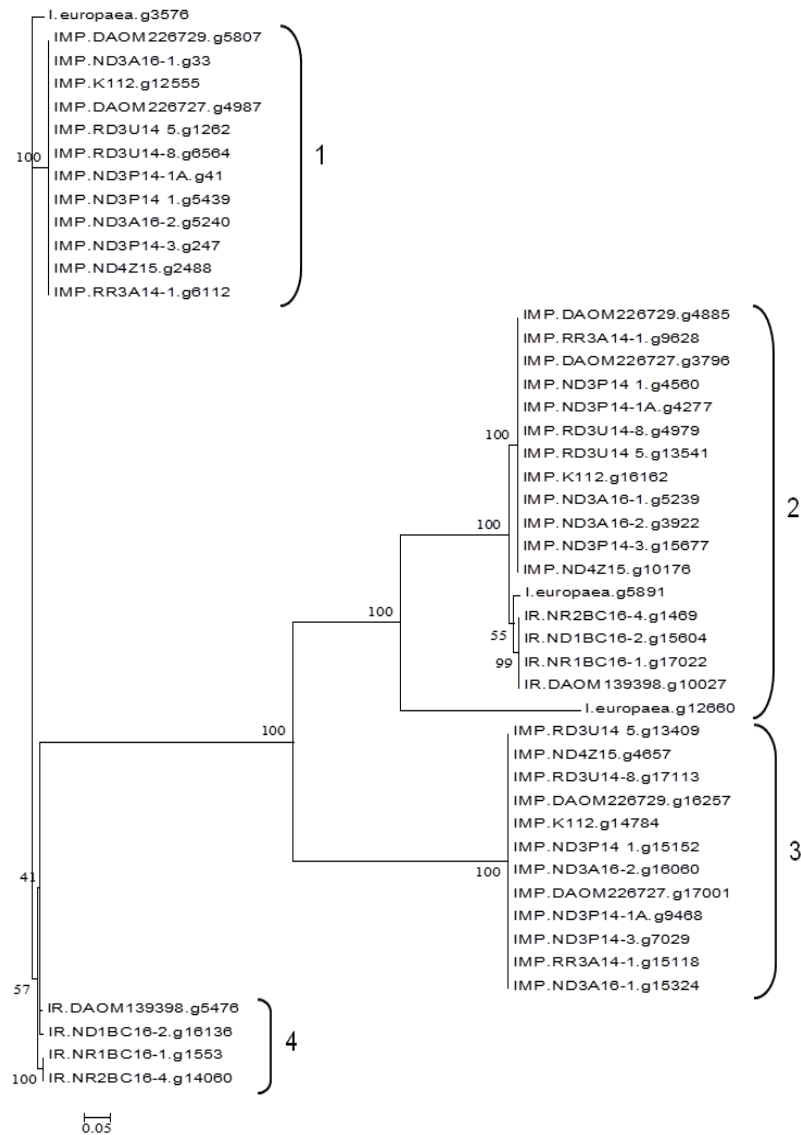



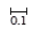

**Figure S10.** Relatedness of the aa sequences of the mating type 1-1-3 (MAT1-1-3)

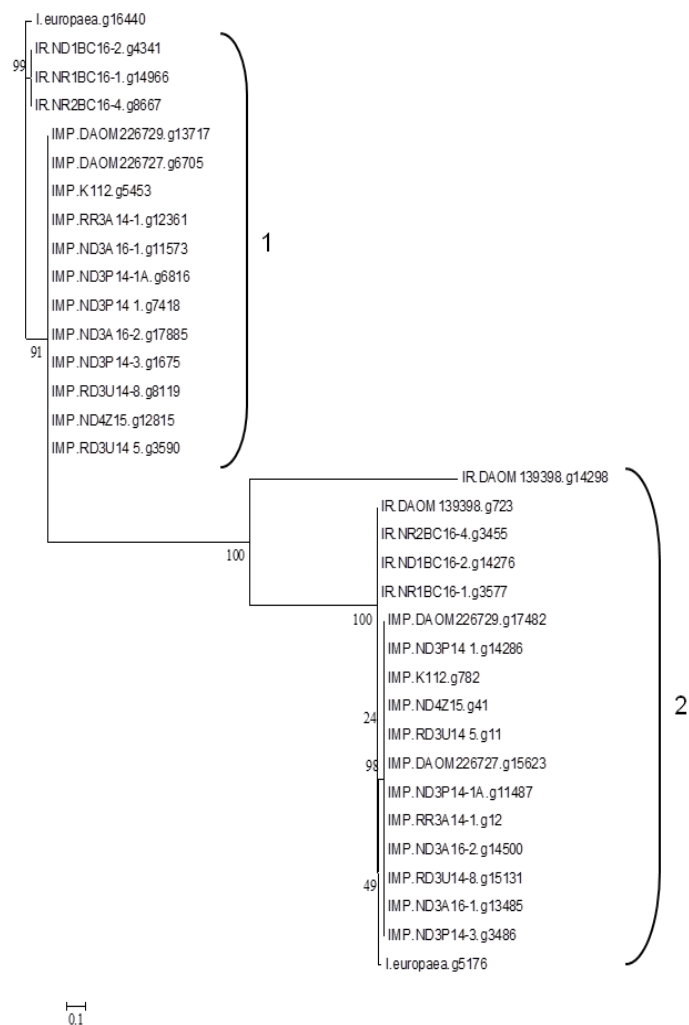

Supplement: s1 [file s1]
